# Supplementary material
Source: publisher figshare collection journal article supplement (https://springernature.figshare.com/ndownloader/files/12742787)
Supplement: Supplementary file [file 12742787]

# **PIPEBAR and OverlapPER: tools for a fast and accurate DNA barcoding analysis and paired-end assembly**

Renato Renison Moreira Oliveira<sup>a,b,c</sup>, Gisele Lopes Nunes<sup>a</sup>, Talvane Glauber Lopes de Lima<sup>a</sup>,  
Guilherme Oliveira<sup>a,d</sup>, Ronnie Alves<sup>a,b,c</sup>

<sup>a</sup> Instituto Tecnológico Vale, Belém, Pará, Brazil;

<sup>b</sup> Computer Science Graduate Program (PPGCC), UFPA (Pará-PA), Belém, Pará, Brazil;

<sup>c</sup> Laboratory of Bioinformatics and High-performance Computing (LaBioCAD), UFPA (Pará-PA), Belém, Pará, Brazil.

<sup>d</sup> Genetics Graduate Program, UFPA (Pará-PA), Belém, Pará, Brazil.

Corresponding authors: [renato.renison@gmail.com](mailto:renato.renison@gmail.com); [Ronnie.Alves@itv.org](mailto:Ronnie.Alves@itv.org)

Email addresses:

RRMO: [renato.renison@gmail.com](mailto:renato.renison@gmail.com)

GLN: [gilopesnunes@gmail.com](mailto:gilopesnunes@gmail.com)

TGLL: [talvane.glauber@gmail.com](mailto:talvane.glauber@gmail.com)

GO: [guilherme.oliveira@itv.org](mailto:guilherme.oliveira@itv.org)

RA: [ronnie.alves@itv.org](mailto:ronnie.alves@itv.org)

## Supplementary material

Obtaining the test dataset:

The whole dataset used as input to PIPEBAR, SeqTrace and Geneious can be downloaded at <https://sourceforge.net/projects/pipebar/files/TraceFiles/>

### PIPEBAR automatic installation

To facilitate the use of PIPEBAR by the users, we created a docker image which will enable the user to run PIPEBAR without installing its dependencies.

### **Installation using docker (see <https://docs.docker.com/>):**

A docker image is available so the installation of all required tools are already wrapped up for usage along PIPEBAR.

#### **Step 1 – Installing Docker and wget (prerequisites)**

>> sudo apt-get install docker.io

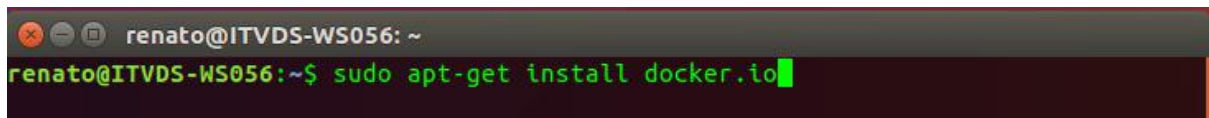A terminal window with a dark background. The prompt is 'renato@ITVDS-WS056: ~'. The command 'sudo apt-get install docker.io' is entered and highlighted in green.

>> sudo apt-get install wget

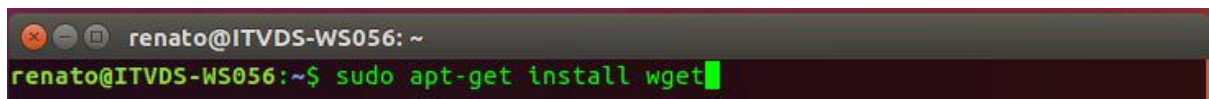A terminal window with a dark background. The prompt is 'renato@ITVDS-WS056: ~'. The command 'sudo apt-get install wget' is entered and highlighted in green.

#### **Step 2 – Checking Docker installation**

>> sudo docker --version

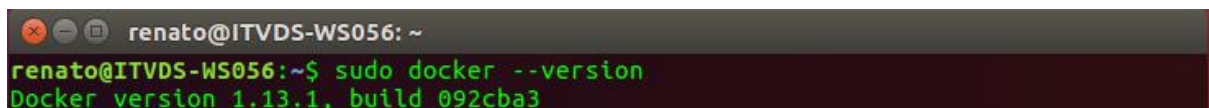A terminal window with a dark background. The prompt is 'renato@ITVDS-WS056: ~'. The command 'sudo docker --version' is entered and highlighted in green. The output 'Docker version 1.13.1, build 092cba3' is displayed below the command.

#### **Step 3 – Downloading the Pipebar Script**

In this step, you will download the script, available on SourceForge, that automatize the Pipebar pipeline. To download the script, enter:

>>wget <https://sourceforge.net/projects/pipebar/files/pipebarScript.sh>

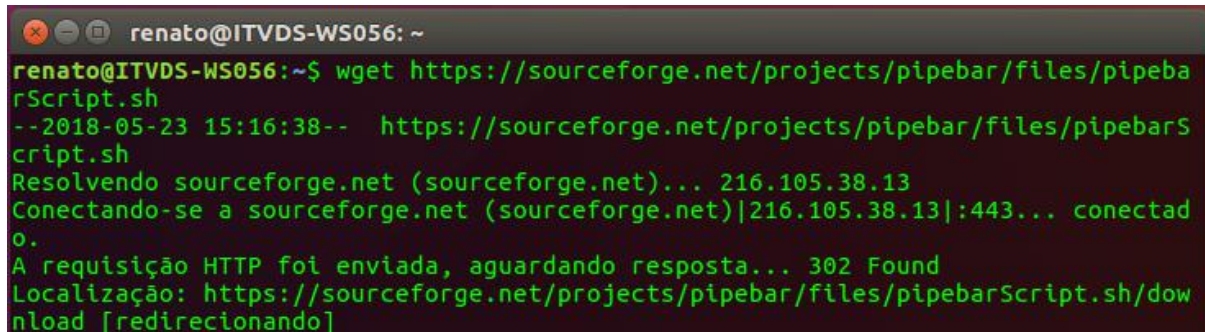

```
renato@ITVDS-WS056: ~  
renato@ITVDS-WS056:~$ wget https://sourceforge.net/projects/pipebar/files/pipebarScript.sh  
--2018-05-23 15:16:38-- https://sourceforge.net/projects/pipebar/files/pipebarScript.sh  
Resolvendo sourceforge.net (sourceforge.net)... 216.105.38.13  
Conectando-se a sourceforge.net (sourceforge.net)|216.105.38.13|:443... conectado.  
A requisição HTTP foi enviada, aguardando resposta... 302 Found  
Localização: https://sourceforge.net/projects/pipebar/files/pipebarScript.sh/download [redireccionando]
```

#### Step 4 - Initiating Pipebar

After downloading the script, you will be able to run the pipeline. With superuser permission you will type:

>>sudo sh pipebarScript.sh path/to/forward/reads path/to/reverse/reads

You need to pass two parameters, the path to forward and reverse reads. Once you entered the above command you will get a similar output, regarding the creation of the Pipebar container.

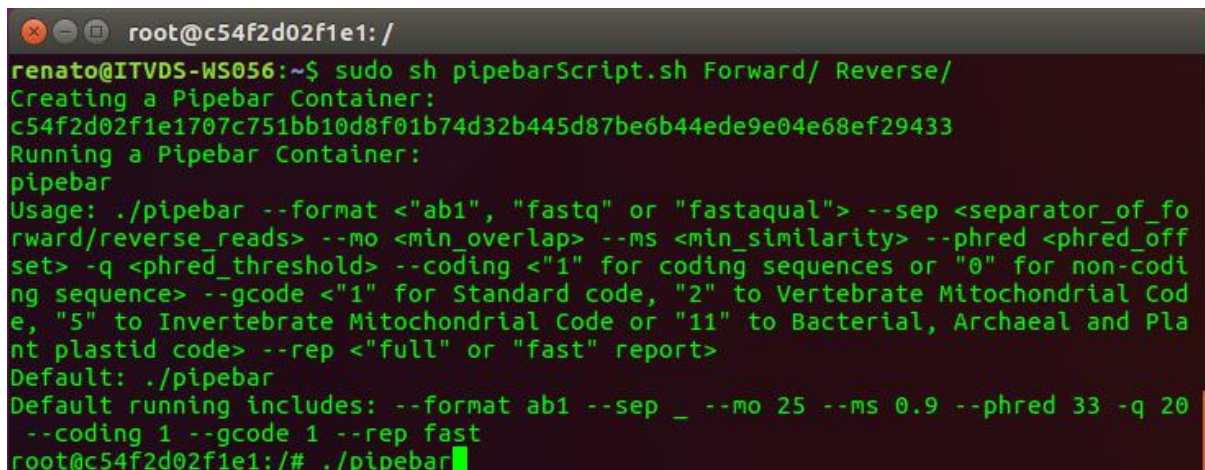

```
root@c54f2d02f1e1: /  
renato@ITVDS-WS056:~$ sudo sh pipebarScript.sh Forward/ Reverse/  
Creating a Pipebar Container:  
c54f2d02f1e1707c751bb10d8f01b74d32b445d87be6b44ede9e04e68ef29433  
Running a Pipebar Container:  
pipebar  
Usage: ./pipebar --format <"ab1", "fastq" or "fastaqual"> --sep <separator_of_forward/reverse_reads> --mo <min_overlap> --ms <min_similarity> --phred <phred_offset> -q <phred_threshold> --coding <"1" for coding sequences or "0" for non-coding sequence> --gcode <"1" for Standard code, "2" to Vertebrate Mitochondrial Code, "5" to Invertebrate Mitochondrial Code or "11" to Bacterial, Archaeal and Plant plastid code> --rep <"full" or "fast" report>  
Default: ./pipebar  
Default running includes: --format ab1 --sep _ --mo 25 --ms 0.9 --phred 33 -q 20 --coding 1 --gcode 1 --rep fast  
root@c54f2d02f1e1:/# ./pipebar
```

#### Step 5 - Running Pipebar

At this point you will be enabled to run the pipeline, as it follows.

```
>./pipebar --format <"ab1", "fastq" or "fastaqual"> --sep  
<separator_of_forward/reverse_reads> --mo <min_overlap> --ms <min_similarity> --phred  
<phred_offset> -q <phred_threshold> --coding <"1" for coding sequences or "0" for  
non-coding" sequence> --gcode <"1" for Standard code, "2" to Vertebrate Mitochondrial Code,  
"5" to Invertebrate Mitochondrial Code or "11" to Bacterial, Archaeal and Plant plastid code>  
--rep <"full" or "fast" report>
```

Ex: ./pipebar --format ab1 --sep \_ --mo 25 --ms 0.9 --phred 33 -q 20 --coding 1 --gcode 1 --rep fast

```
root@c54f2d02f1e1: /
root@c54f2d02f1e1:/# ./pipebar
working with forward.fastq
Input and filter stats:
  Input sequences: 436
  Input bases: 252 822
```

Options:

- h|--help  
Show this output.
- V|--version  
Show version information.
- format <string>  
Input format. Can be "ab1", "fastq" or "fastaqual".
- sep <string>  
The IDs from both forward and reverse reads must have a separator.  
Ex: 001read\_forward and 001read\_reverse have "\_" (default) as separator
- mo <integer>  
Length of the minimum overlap between the paired reads (default is 25).
- ms <float>  
Percentage of the accepted minimum similarity in an overlap region of two paired reads (default is 0.9).
- phred <integer>  
The offset of the PHRED qualities codes used.  
Can be 33 or 64 (default is 33).
- q <integer>  
The minimum quality value for trimming and filtering steps (default is 20).
- coding <integer>  
Inform if the barcode sequences to be analyzed are from coding (e.g. rbcL, matK) or non-coding (e.g. ITS, atpF-trnH) regions.  
Inform "1" for coding or "0" for non-coding sequences (default is 1)
- gcode <integer>  
The genetic code to be used when translating the nucleotide sequences into protein, when it comes to a coding region. It can be "1" to Standard Code, "2" to Vertebrate Mitochondrial Code, "5" to Invertebrate Mitochondrial Code or "11" to Bacterial, Archaeal and Plant plastid code.
- rep <string>  
A full report will generate a quality graphical report for each barcode sequence analyzed, while a fast report will generate an overview of the analyzed barcodes in one single report (default is "fast")

When the pipeline finishes its execution, you need to exit the pipebar environment, just enter:  
>>exit

```

root@38171f254d55:/# exit
exit
Stopping Container:
pipebar
Removing Container:
pipebar
Done!
renato@ITVDS-WS056:~$

```

## Step 6 - Getting the Results

The pipebar script saves the results in the ResultPipebar folder that is in the same directory from where it was called. The resulting files are:

- ✧ notAssembled-1.fastq
- ✧ notAssembled-2.fastq
- ✧ overlaped.fasta
- ✧ overlapped.fastq
- ✧ report.pdf
- ✧ TrimmedStop\_DNA.fasta
- ✧ TrimmedStop\_Prot.fasta
- ✧ fastqc\_report
  - overlapped\_fastqc.html
  - overlapped\_fastqc.zip

```

renato@ITVDS-WS056:~$ ls ResultPipebar/
fastqc_report  overlaped.fasta  TrimmedStop_DNA.fasta
notAssembled-1.fastq  overlapped.fastq  TrimmedStop_Prot.fasta
notAssembled-2.fastq  report.pdf
renato@ITVDS-WS056:~$

```

## PIPEBAR manual installation

### Installing dependencies manually:

You will need to download the following packages and install them:

- EMBOSS: <ftp://emboss.open-bio.org/pub/EMBOSS/old/6.5.0/EMBOSS-6.5.7.tar.gz>
- Prinseq: <http://prinseq.sourceforge.net/>
- fastx\_toolkit: [http://hannonlab.cshl.edu/fastx\\_toolkit/](http://hannonlab.cshl.edu/fastx_toolkit/)
- BBmap: [https://sourceforge.net/projects/bbmap/?source=typ\\_redirect](https://sourceforge.net/projects/bbmap/?source=typ_redirect)
- FastQC: <http://www.bioinformatics.babraham.ac.uk/projects/fastqc/>
- OverlapPER: <https://sourceforge.net/projects/PIPEBAR/files/overlapper.py/download>

### Step 1 - Running Pipebar

At this point you will be enabled to run the pipeline, as it follows.

>./pipebar --format <"ab1", "fastq" or "fastaqual"> --sep  
 <separator\_of\_forward/reverse\_reads> --mo <min\_overlap> --ms <min\_similarity> --phred  
 <phred\_offset> -q <phred\_threshold> --coding <"1" for coding sequences or "0" for  
 non-coding" sequence> --gcode <"1" for Standard code, "2" to Vertebrate Mitochondrial Code,  
 "5" to Invertebrate Mitochondrial Code or "11" to Bacterial, Archaeal and Plant plastid code>  
 --rep <"full" or "fast" report>

Ex: ./pipebar --format ab1 --sep \_ --mo 25 --ms 0.9 --phred 33 -q 20 --coding 1 --gcode 1 --rep  
 fast

```

root@c54f2d02f1e1: /
root@c54f2d02f1e1:/# ./pipebar
working with forward.fastq
Input and filter stats:
  Input sequences: 436
  Input bases: 252 822
  
```

Options:

- h|--help  
Show this output.
- V|--version  
Show version information.
- format <string>  
Input format. Can be "ab1", "fastq" or "fastaqual".
- sep <string>  
The IDs from both forward and reverse reads must have a separator.  
Ex: 001read\_forward and 001read\_reverse have "\_" (default) as separator
- mo <integer>  
Length of the minimum overlap between the paired reads (default is 25).
- ms <float>  
Percentage of the accepted minimum similarity in an overlap region of two paired reads (default is 0.9).
- phred <integer>  
The offset of the PHRED qualities codes used.  
Can be 33 or 64 (default is 33).
- q <integer>  
The minimum quality value for trimming and filtering steps (default is 20).
- coding <integer>  
Inform if the barcode sequences to be analyzed are from coding (e.g. rbcL, matK) or non-coding (e.g. ITS, atpF-trnH) regions.  
Inform "1" for coding or "0" for non-coding sequences (default is 1)
- gcode <integer>  
The genetic code to be used when translating the nucleotide sequences into protein, when it comes to a coding region. It can be "1" to Standard Code, "2" to Vertebrate Mitochondrial Code, "5" to Invertebrate Mitochondrial Code or "11" to Bacterial, Archaeal and Plant plastid code.

`--rep <string>`

A full report will generate a quality graphical report for each barcode sequence analyzed, while a fast report will generate an overview of the analyzed barcodes in one single report (default is "fast")

## Step 2 - Getting the Results

The resulting files are:

- ☪ notAssembled-1.fastq
- ☪ notAssembled-2.fastq
- ☪ overlaped.fasta
- ☪ overlapped.fastq
- ☪ report.pdf
- ☪ TrimmedStop\_DNA.fasta
- ☪ TrimmedStop\_Prot.fasta
- ☪ fastqc\_report
  - overlapped\_fastqc.html
  - overlapped\_fastqc.zip

## OverlapPER tests:

### Simulated Dataset creation:

ART was used to simulate the Illumina sequencing of 1,000,000 paired end reads.

```
>art_illumina -ss MSv3 -p -sam -na -i ecoli_K-12.fasta -l 250 -c 1000000 -ir 0.09 -ir2 0.015 -dr 0.011 -dr2 0.023 -m 400 -s 10 -o illumina_ecoli_ART
```

The simulated data is available on <https://sourceforge.net/projects/overlapper-reads/>

## Tools commands

### OverlapPER:

```
>time python3 overlapper.py -f illumina_ecoli_ART1.fq -r illumina_ecoli_ART2.fq --mo 10 --ms 0.9
```



Merged reads: 999706

Not merged reads: 294

real 8m38.279s  
user 8m30.844s  
sys 0m7.340s

## FLASH:

```
>time flash -t 1 -O -M 1000 -x 0.1 -o merge.assembled illumina_ecoli_ART1.fq  
illumina_ecoli_ART2.fq  
[FLASH] Starting FLASH v1.2.11  
[FLASH] Fast Length Adjustment of SHort reads  
[FLASH]  
[FLASH] Input files:  
[FLASH] ../illumina_ecoli_ART1.fq  
[FLASH] ../illumina_ecoli_ART2-2.fq  
[FLASH]  
[FLASH] Output files:  
[FLASH] ./merge.assembled.extendedFragments.fastq  
[FLASH] ./merge.assembled.notCombined_1.fastq  
[FLASH] ./merge.assembled.notCombined_2.fastq  
[FLASH] ./merge.assembled.hist  
[FLASH] ./merge.assembled.histogram  
[FLASH]  
[FLASH] Parameters:  
[FLASH] Min overlap: 10  
[FLASH] Max overlap: 1000  
[FLASH] Max mismatch density: 0.100000  
[FLASH] Allow "outie" pairs: true  
[FLASH] Cap mismatch quals: false  
[FLASH] Combiner threads: 1  
[FLASH] Input format: FASTQ, phred_offset=33  
[FLASH] Output format: FASTQ, phred_offset=33  
[FLASH]  
[FLASH] Starting reader and writer threads  
[FLASH] Starting 1 combiner threads  
[FLASH] Processed 25000 read pairs  
[FLASH] Processed 50000 read pairs  
[FLASH] Processed 75000 read pairs  
[FLASH] Processed 100000 read pairs  
[FLASH] Processed 125000 read pairs
```



[FLASH] Processed 150000 read pairs  
 [FLASH] Processed 175000 read pairs  
 [FLASH] Processed 200000 read pairs  
 [FLASH] Processed 225000 read pairs  
 [FLASH] Processed 250000 read pairs  
 [FLASH] Processed 275000 read pairs  
 [FLASH] Processed 300000 read pairs  
 [FLASH] Processed 325000 read pairs  
 [FLASH] Processed 350000 read pairs  
 [FLASH] Processed 375000 read pairs  
 [FLASH] Processed 400000 read pairs  
 [FLASH] Processed 425000 read pairs  
 [FLASH] Processed 450000 read pairs  
 [FLASH] Processed 475000 read pairs  
 [FLASH] Processed 500000 read pairs  
 [FLASH] Processed 525000 read pairs  
 [FLASH] Processed 550000 read pairs  
 [FLASH] Processed 575000 read pairs  
 [FLASH] Processed 600000 read pairs  
 [FLASH] Processed 625000 read pairs  
 [FLASH] Processed 650000 read pairs  
 [FLASH] Processed 675000 read pairs  
 [FLASH] Processed 700000 read pairs  
 [FLASH] Processed 725000 read pairs  
 [FLASH] Processed 750000 read pairs  
 [FLASH] Processed 775000 read pairs  
 [FLASH] Processed 800000 read pairs  
 [FLASH] Processed 825000 read pairs  
 [FLASH] Processed 850000 read pairs  
 [FLASH] Processed 875000 read pairs  
 [FLASH] Processed 900000 read pairs  
 [FLASH] Processed 925000 read pairs  
 [FLASH] Processed 950000 read pairs  
 [FLASH] Processed 975000 read pairs  
 [FLASH] Processed 1000000 read pairs  
 [FLASH]  
 [FLASH] Read combination statistics:  
 [FLASH]   Total pairs:    1000000  
 [FLASH]   Combined pairs:  326686  
 [FLASH]       Innie pairs:  326626 (99.98% of combined)  
 [FLASH]       Outie pairs:   60 (0.02% of combined)  
 [FLASH]   Uncombined pairs: 673314  
 [FLASH]   Percent combined: 32.67%  
 [FLASH]

```
[FLASH] Writing histogram files.
[FLASH]
[FLASH] FLASH v1.2.11 complete!
[FLASH] 52.891 seconds elapsed
```

```
real    0m52.914s
user    0m53.356s
sys     0m3.324s
```

## PEAR

```
>time pear -f illumina_ecoli_ART1.fq -r illumina_ecoli_ART2.fq -o pear.merged
```

```

  _____
 | _\|____| /\ | _\
 | | | | / _\ | | |
 | _/ | | / ____ \| _<
 | | |____/ / \_\| \_\
```

PEAR v0.9.8 [April 9, 2015]

Citation - PEAR: a fast and accurate Illumina Paired-End reAd mergeR  
 Zhang et al (2014) Bioinformatics 30(5): 614-620 | doi:10.1093/bioinformatics/btt593

```
Forward reads file.....: illumina_ecoli_ART1.fq
Reverse reads file.....: illumina_ecoli_ART2.fq
PHRED.....: 33
Using empirical frequencies.....: YES
Statistical method.....: OES
Maximum assembly length.....: 999999
Minimum assembly length.....: 50
p-value.....: 0.010000
Quality score threshold (trimming): 0
Minimum read size after trimming...: 1
Maximal ratio of uncalled bases....: 1.000000
Minimum overlap.....: 10
Scoring method.....: Scaled score
Threads.....: 1
```

```
Allocating memory.....: 200,000,000 bytes
Computing empirical frequencies....: DONE
A: 0.246168
C: 0.253836
G: 0.253816
T: 0.246180
```

0 uncalled bases  
Assembling reads: 100%

Assembled reads .....: 995,648 / 1,000,000 (99.565%)  
Discarded reads .....: 0 / 1,000,000 (0.000%)  
Not assembled reads .....: 4,352 / 1,000,000 (0.435%)  
Assembled reads file.....: pear.merged.assembled.fastq  
Discarded reads file.....: pear.merged.discarded.fastq  
Unassembled forward reads file.....: pear.merged.unassembled.forward.fastq  
Unassembled reverse reads file.....: pear.merged.unassembled.reverse.fastq

real 22m42.668s  
user 22m41.456s  
sys 0m1.184s

## COPE

```
>time cope -a illumina_ecoli_ART1.fq -b illumina_ecoli_ART2.fq -o cope_full_mode.fq -2  
left1.fq -3 left2.fq -s 33 -u 1000 -c 0.9 -m 3 -t kmer-cope.freq.cz -f kmer-cope.freq.cz.len  
Program start..  
Program:      COPE (Connecting Overlapped Pair-End reads)  
Version:      v1.1.2  
Author:       BGI-ShenZhen  
CompileDate:  Jul 20 2016 time: 14:35:36  
Current time:  Mon May 14 20:18:48 2018  
Command line:  cope -a ../illumina_ecoli_ART1.fixed.fq  
-b ../illumina_ecoli_ART2-2.fq -o cope_full_mode.fq -2 left1.fq -3 left2.fq -s 33 -u 1000 -c  
0.9 -m 3 -t ../kmer-cope.freq.cz -f ../kmer-cope.freq.cz.len  
loading kmerfreq table...  
kmer freq table:  
kmer_num    node_num    error_freq_num    error_ratio    suspicious_freq_num  
suspicious_ratio    normal_freq_num    normal_ratio  
repeat_freq_numrepeat_ratio  
468304845   94053426    88334798    0.939198    1250904    0.0132999  
178635      0.00189929  4289089    0.0456027  
finish loading kmer freq table!  
Run time: 11s.  
Begin read files and connect pairs...  
Process pair reads number: 1000000  
Connect reads finished!  
Kmer frequency based connection table:
```

| total_pairs | connected_pairs | connect_ratio(%) | low_quality_pairs | low_quality_ratio(%) |
|-------------|-----------------|------------------|-------------------|----------------------|
| 1000000     | 292303          | 29.2303          | 0                 | 0                    |

starting to do cross connect for 707697 pair reads

Use connected file to cross

Count pair kmer number...

Count kmer pair number: 0

loading pair kmer information!

starting to load pair kmer file...

loading kmer file finished! Totally load kmer pair number is: 0

sort pair kmers!

load hashset!

final hash set size is 1048583

load all reads to get cross reads

Begin load read file: cope\_full\_mode.fq

finished load read file: cope\_full\_mode.fq ! totally load 292303 reads

Get cross read finished and totally cross 0 reads!

Begin to cross connect reads, processing file: cross.read.inf0.gz ...

No cross reads, cross reads connect finished!

All done!

Cross connection table:

| total_pairs | no_marker | have_cross | have_cross_ratio(%) | have_cross_connect | cross_connect_ratio(%) |
|-------------|-----------|------------|---------------------|--------------------|------------------------|
| 0           | 0         | 0          | -nan                | 0                  | -nan                   |

All done, Thank you!

Run time: 469s.

real 7m48.480s

user 7m28.328s

sys 0m19.956s

## BBMerge:

time bbmerge.sh in1=illumina\_ecoli\_ART1.fixed.fq in2=illumina\_ecoli\_ART2-2.fq  
 out=bbmerge\_assembled.fastq outu1=bbmerge\_unassembled1.fastq  
 outu2=bbmerge\_unassembled2.fastq minoverlap=10 maxratio=0.1

Version 38.01 [in1=illumina\_ecoli\_ART1.fixed.fq, in2=illumina\_ecoli\_ART2-2.fq,  
 out=bbmerge\_assembled.fastq, outu1=bbmerge\_unassembled1.fastq,  
 outu2=bbmerge\_unassembled2.fastq, minoverlap=10, maxratio=0.1]

Writing mergable reads merged.

Started output threads.

Total time: 24.879 seconds.

|              |         |         |
|--------------|---------|---------|
| Pairs:       | 1000000 |         |
| Joined:      | 201842  | 20,184% |
| Ambiguous:   | 768588  | 76,859% |
| No Solution: | 29570   | 2,957%  |
| Too Short:   | 0       | 0,000%  |

|                     |       |
|---------------------|-------|
| Avg Insert:         | 401.8 |
| Standard Deviation: | 10.1  |
| Mode:               | 401   |

|                  |           |
|------------------|-----------|
| Insert range:    | 104 - 491 |
| 90th percentile: | 415       |
| 75th percentile: | 409       |
| 50th percentile: | 402       |
| 25th percentile: | 395       |
| 10th percentile: | 389       |

|      |           |
|------|-----------|
| real | 0m26.408s |
| user | 1m43.780s |
| sys  | 0m1.900s  |

## Results validation

Blast was used in order to validate the results generated by each of the merger tools  
First, we created a database of the reference genome fasta file:

```
>formatdb -p F -i ecoli_K-12.fasta
```

Second, we compared all the merged sequences against the created database.

```
>blastall -p blastn -d ecoli_K-12.fasta -i ../overlapped.fastq -a 2 -m 9 -o blast_output
```

An in-house script was used to summarize all the best hits from each merged sequence.

The results of OverlapPER are also available on  
<https://sourceforge.net/projects/overlapper-reads/>

## PIPEBAR results

PIPEBAR has been tested over the dataset presented above. The comparison of PIPEBAR results and the others softwares are presented in Table 1 of the main manuscript. We submitted fastq files to FastQC, in order to verify the quality of the generated sequences. Given that only PIPEBAR and Geneious generate FASTQ files as output, we only compare their results.

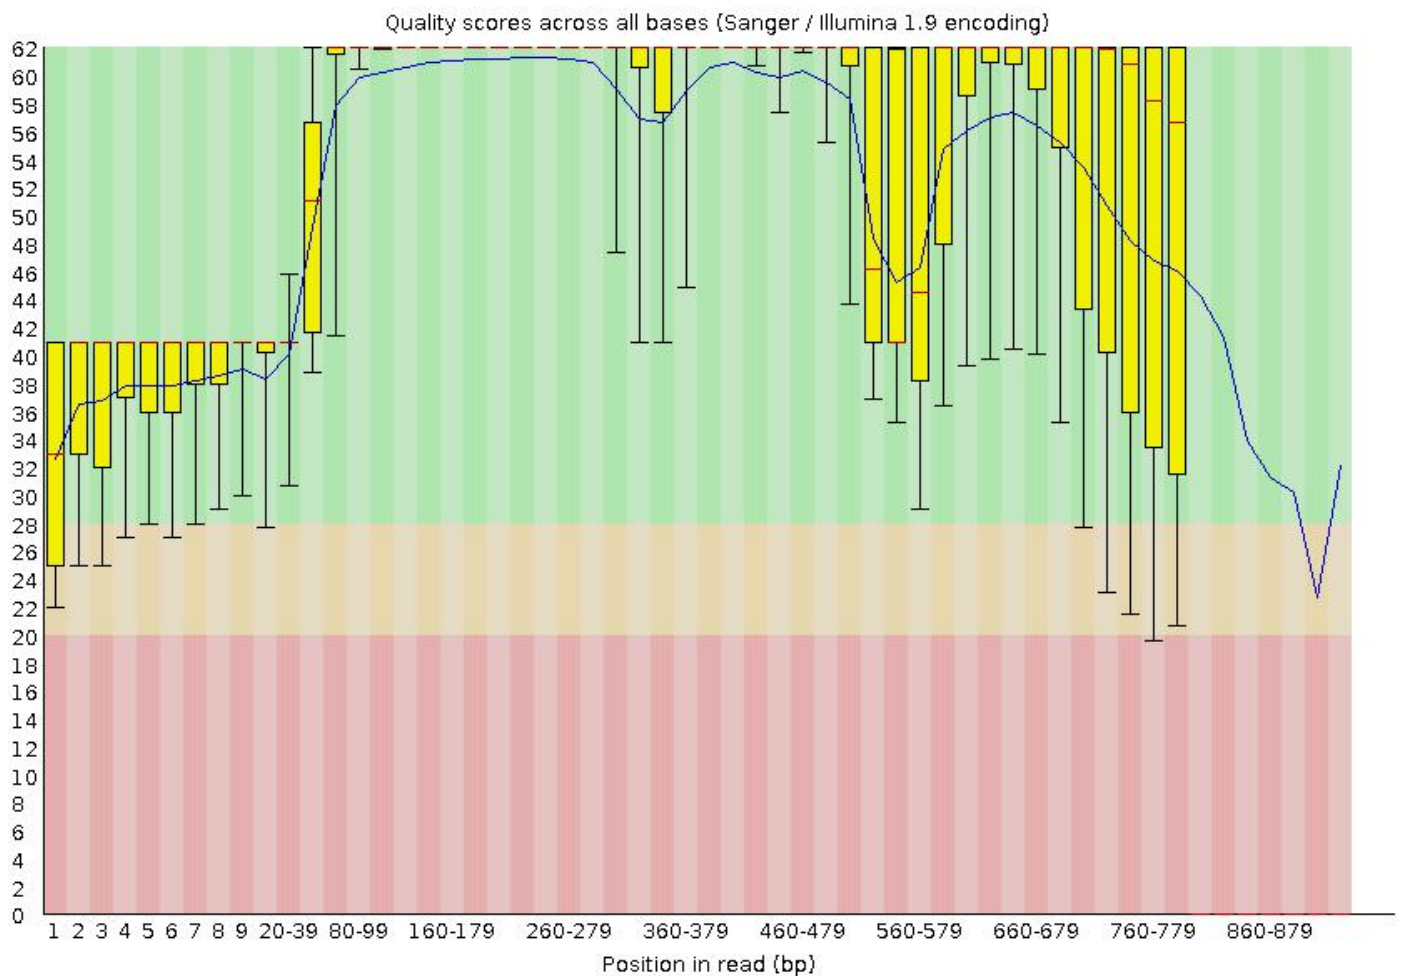

Figure S1 - Box diagram of bases quality for all sequences generated by PIPEBAR.

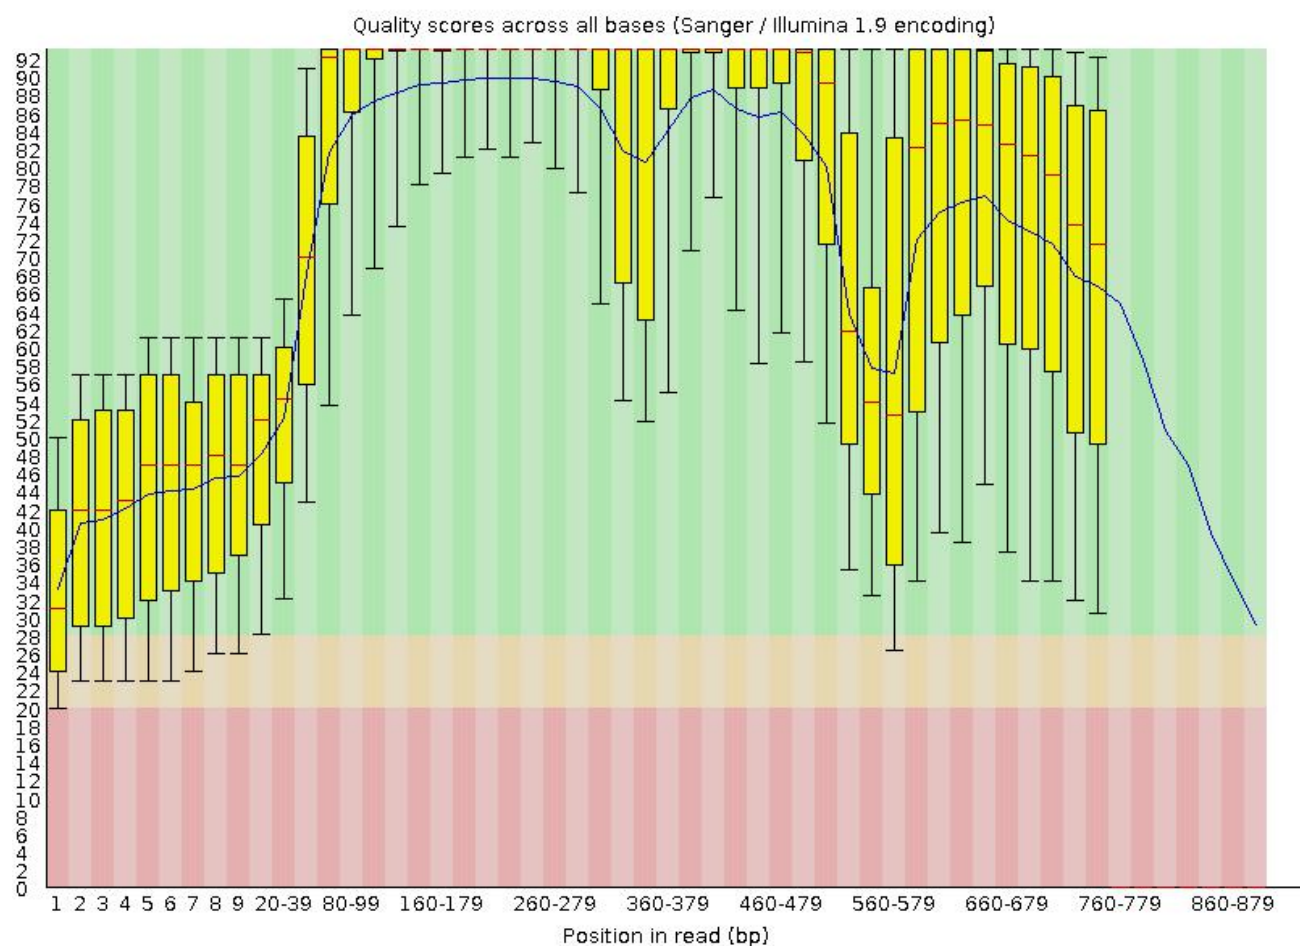

Figure S2 - Box diagram of bases quality for all sequences generated by Geneious.

Figures S1 and S2 show that the overall quality bases from the sequences generated by PIPEBAR are very similar to the quality generated by our benchmark (Geneious).



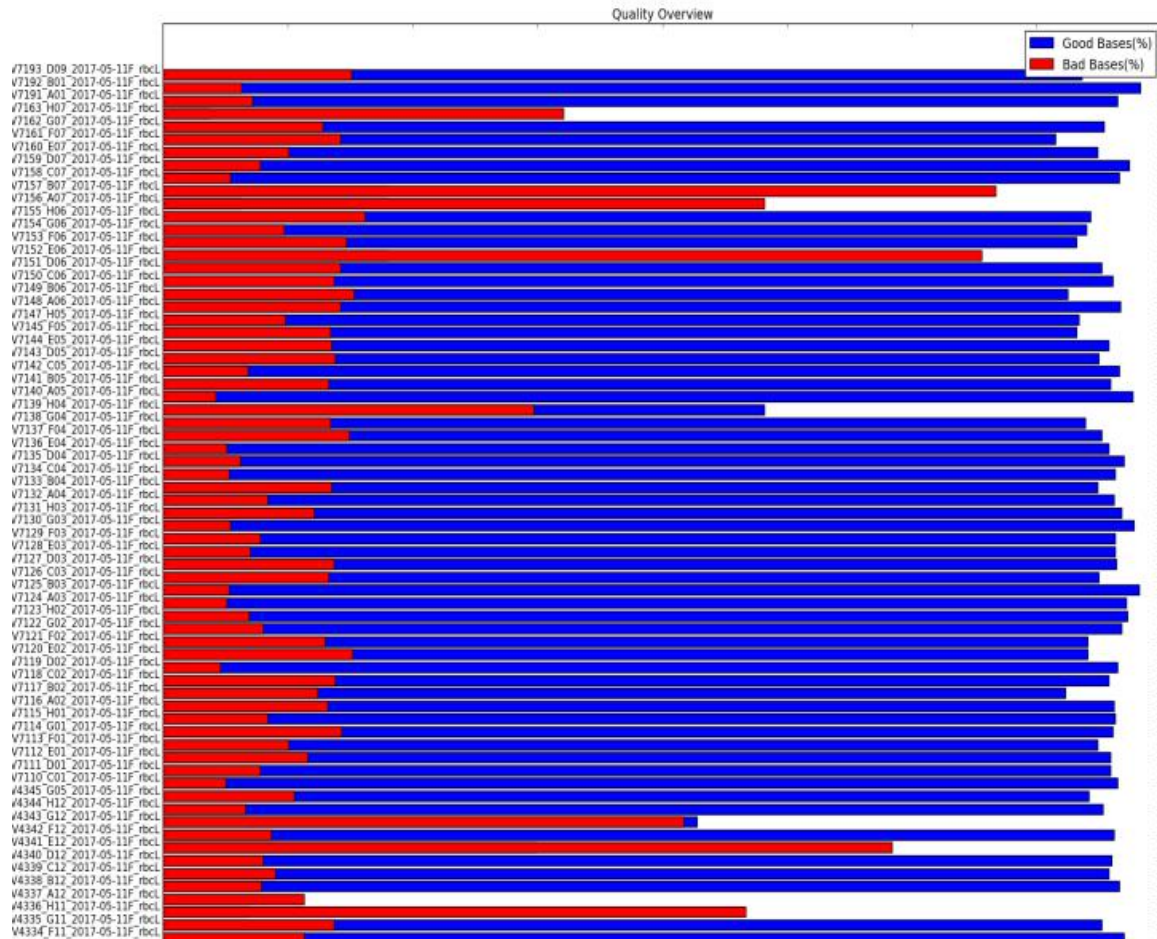

Figure S3 - Quality report generated by Pipebar. Each bar represents the quality of the bases from a barcode. The red color indicates quality below the specified PHRED threshold, while blue color indicates quality above that threshold.
